# Supplementary material for: Broad Blockade Antibody Responses in Human Volunteers after Immunization with a Multivalent Norovirus VLP Candidate Vaccine: Immunological Analyses from a Phase I Clinical Trial
Source: PLoS Med. 2015 Mar 24;12(3):e1001807. doi: 10.1371/journal.pmed.1001807 (PMC4371888; doi:10.1371/journal.pmed.1001807)
Supplement: S1 Table — (XLSX) [file pmed.1001807.s006.xlsx]

## Sheet: Sheet1
Antibody	Day	VLP.1	VLP.2	D.Value
IgG	0	GI.3.1999	GI.1.1968	1.64283
IgG	0	GI.4.2000	GI.1.1968	0.85277
IgG	0	GII.4C	GI.1.1968	1.72555
IgG	0	GII.4.1997	GI.1.1968	1.75024
IgG	0	GII.4.2002	GI.1.1968	1.32192
IgG	0	GII.4.2006	GI.1.1968	1.39227
IgG	0	GII.4.2012	GI.1.1968	1.10721
IgG	0	GII.3.1999	GI.1.1968	2.3462
IgG	0	GII.14.1999	GI.1.1968	0.891888
IgG	0	GII.2.2002	GI.1.1968	1.99799
IgG	0	GI.4.2000	GI.3.1999	1.9724
IgG	0	GII.4C	GI.3.1999	2.86898
IgG	0	GII.4.1997	GI.3.1999	1.96296
IgG	0	GII.4.2002	GI.3.1999	1.8724
IgG	0	GII.4.2006	GI.3.1999	2.67298
IgG	0	GII.4.2012	GI.3.1999	1.81378
IgG	0	GII.3.1999	GI.3.1999	1.03117
IgG	0	GII.14.1999	GI.3.1999	1.87138
IgG	0	GII.2.2002	GI.3.1999	0.987287
IgG	0	GII.4C	GI.4.2000	2.26296
IgG	0	GII.4.1997	GI.4.2000	2.35536
IgG	0	GII.4.2002	GI.4.2000	1.82976
IgG	0	GII.4.2006	GI.4.2000	1.48349
IgG	0	GII.4.2012	GI.4.2000	1.53018
IgG	0	GII.3.1999	GI.4.2000	2.55049
IgG	0	GII.14.1999	GI.4.2000	1.48448
IgG	0	GII.2.2002	GI.4.2000	2.41679
IgG	0	GII.4.1997	GII.4C	1.79863
IgG	0	GII.4.2002	GII.4C	1.45891
IgG	0	GII.4.2006	GII.4C	1.59726
IgG	0	GII.4.2012	GII.4C	1.52386
IgG	0	GII.3.1999	GII.4C	3.3017
IgG	0	GII.14.1999	GII.4C	1.55477
IgG	0	GII.2.2002	GII.4C	2.72442
IgG	0	GII.4.2002	GII.4.1997	0.731527
IgG	0	GII.4.2006	GII.4.1997	2.48507
IgG	0	GII.4.2012	GII.4.1997	1.24254
IgG	0	GII.3.1999	GII.4.1997	2.22182
IgG	0	GII.14.1999	GII.4.1997	1.22758
IgG	0	GII.2.2002	GII.4.1997	1.67274
IgG	0	GII.4.2006	GII.4.2002	1.8328
IgG	0	GII.4.2012	GII.4.2002	0.558948
IgG	0	GII.3.1999	GII.4.2002	2.23859
IgG	0	GII.14.1999	GII.4.2002	0.897463
IgG	0	GII.2.2002	GII.4.2002	1.75223
IgG	0	GII.4.2012	GII.4.2006	1.39048
IgG	0	GII.3.1999	GII.4.2006	3.34465
IgG	0	GII.14.1999	GII.4.2006	1.55004
IgG	0	GII.2.2002	GII.4.2006	2.99569
IgG	0	GII.3.1999	GII.4.2012	2.3317
IgG	0	GII.14.1999	GII.4.2012	0.848299
IgG	0	GII.2.2002	GII.4.2012	1.91792
IgG	0	GII.14.1999	GII.3.1999	2.54403
IgG	0	GII.2.2002	GII.3.1999	0.737948
IgG	0	GII.2.2002	GII.14.1999	2.13156
IgG	7	GI.3.1999	GI.1.1968	3.39779
IgG	7	GI.4.2000	GI.1.1968	2.70236
IgG	7	GII.4C	GI.1.1968	4.24121
IgG	7	GII.4.1997	GI.1.1968	3.97533
IgG	7	GII.4.2002	GI.1.1968	3.46148
IgG	7	GII.4.2006	GI.1.1968	4.06617
IgG	7	GII.4.2012	GI.1.1968	3.79851
IgG	7	GII.3.1999	GI.1.1968	3.00043
IgG	7	GII.14.1999	GI.1.1968	4.04347
IgG	7	GII.2.2002	GI.1.1968	3.80598
IgG	7	GI.4.2000	GI.3.1999	2.09241
IgG	7	GII.4C	GI.3.1999	4.31524
IgG	7	GII.4.1997	GI.3.1999	3.99598
IgG	7	GII.4.2002	GI.3.1999	3.44739
IgG	7	GII.4.2006	GI.3.1999	4.40756
IgG	7	GII.4.2012	GI.3.1999	3.51198
IgG	7	GII.3.1999	GI.3.1999	3.73514
IgG	7	GII.14.1999	GI.3.1999	4.54758
IgG	7	GII.2.2002	GI.3.1999	3.77075
IgG	7	GII.4C	GI.4.2000	4.0947
IgG	7	GII.4.1997	GI.4.2000	3.87825
IgG	7	GII.4.2002	GI.4.2000	3.0768
IgG	7	GII.4.2006	GI.4.2000	3.0342
IgG	7	GII.4.2012	GI.4.2000	2.78582
IgG	7	GII.3.1999	GI.4.2000	2.23929
IgG	7	GII.14.1999	GI.4.2000	2.76342
IgG	7	GII.2.2002	GI.4.2000	2.29904
IgG	7	GII.4.1997	GII.4C	1.3951
IgG	7	GII.4.2002	GII.4C	1.847
IgG	7	GII.4.2006	GII.4C	3.7227
IgG	7	GII.4.2012	GII.4C	2.85385
IgG	7	GII.3.1999	GII.4C	3.8169
IgG	7	GII.14.1999	GII.4C	4.80395
IgG	7	GII.2.2002	GII.4C	3.918
IgG	7	GII.4.2002	GII.4.1997	1.69253
IgG	7	GII.4.2006	GII.4.1997	4.1954
IgG	7	GII.4.2012	GII.4.1997	2.86362
IgG	7	GII.3.1999	GII.4.1997	3.65362
IgG	7	GII.14.1999	GII.4.1997	4.89394
IgG	7	GII.2.2002	GII.4.1997	3.89515
IgG	7	GII.4.2006	GII.4.2002	2.99778
IgG	7	GII.4.2012	GII.4.2002	1.31541
IgG	7	GII.3.1999	GII.4.2002	2.44803
IgG	7	GII.14.1999	GII.4.2002	3.64269
IgG	7	GII.2.2002	GII.4.2002	2.57813
IgG	7	GII.4.2012	GII.4.2006	2.30426
IgG	7	GII.3.1999	GII.4.2006	2.13427
IgG	7	GII.14.1999	GII.4.2006	1.69758
IgG	7	GII.2.2002	GII.4.2006	1.69875
IgG	7	GII.3.1999	GII.4.2012	1.75465
IgG	7	GII.14.1999	GII.4.2012	2.71493
IgG	7	GII.2.2002	GII.4.2012	1.54492
IgG	7	GII.14.1999	GII.3.1999	1.69746
IgG	7	GII.2.2002	GII.3.1999	1.12663
IgG	7	GII.2.2002	GII.14.1999	1.27685
IgG	35	GI.3.1999	GI.1.1968	2.08538
IgG	35	GI.4.2000	GI.1.1968	3.30602
IgG	35	GII.4C	GI.1.1968	3.84195
IgG	35	GII.4.1997	GI.1.1968	4.09684
IgG	35	GII.4.2002	GI.1.1968	4.07242
IgG	35	GII.4.2006	GI.1.1968	5.25953
IgG	35	GII.4.2012	GI.1.1968	5.18733
IgG	35	GII.3.1999	GI.1.1968	3.83776
IgG	35	GII.14.1999	GI.1.1968	4.74492
IgG	35	GII.2.2002	GI.1.1968	3.88544
IgG	35	GI.4.2000	GI.3.1999	2.08851
IgG	35	GII.4C	GI.3.1999	3.44769
IgG	35	GII.4.1997	GI.3.1999	3.78517
IgG	35	GII.4.2002	GI.3.1999	3.44658
IgG	35	GII.4.2006	GI.3.1999	4.40567
IgG	35	GII.4.2012	GI.3.1999	4.26385
IgG	35	GII.3.1999	GI.3.1999	3.06148
IgG	35	GII.14.1999	GI.3.1999	3.77988
IgG	35	GII.2.2002	GI.3.1999	3.01227
IgG	35	GII.4C	GI.4.2000	3.55369
IgG	35	GII.4.1997	GI.4.2000	4.17441
IgG	35	GII.4.2002	GI.4.2000	3.29209
IgG	35	GII.4.2006	GI.4.2000	3.34621
IgG	35	GII.4.2012	GI.4.2000	3.46386
IgG	35	GII.3.1999	GI.4.2000	2.37577
IgG	35	GII.14.1999	GI.4.2000	2.5857
IgG	35	GII.2.2002	GI.4.2000	2.34311
IgG	35	GII.4.1997	GII.4C	1.2518
IgG	35	GII.4.2002	GII.4C	1.33632
IgG	35	GII.4.2006	GII.4C	2.76163
IgG	35	GII.4.2012	GII.4C	2.51224
IgG	35	GII.3.1999	GII.4C	3.02162
IgG	35	GII.14.1999	GII.4C	3.12284
IgG	35	GII.2.2002	GII.4C	2.23041
IgG	35	GII.4.2002	GII.4.1997	1.50847
IgG	35	GII.4.2006	GII.4.1997	3.28143
IgG	35	GII.4.2012	GII.4.1997	2.97369
IgG	35	GII.3.1999	GII.4.1997	3.65738
IgG	35	GII.14.1999	GII.4.1997	3.75015
IgG	35	GII.2.2002	GII.4.1997	2.98571
IgG	35	GII.4.2006	GII.4.2002	1.89163
IgG	35	GII.4.2012	GII.4.2002	1.586
IgG	35	GII.3.1999	GII.4.2002	2.35954
IgG	35	GII.14.1999	GII.4.2002	2.3059
IgG	35	GII.2.2002	GII.4.2002	1.65451
IgG	35	GII.4.2012	GII.4.2006	0.659068
IgG	35	GII.3.1999	GII.4.2006	2.22419
IgG	35	GII.14.1999	GII.4.2006	1.201
IgG	35	GII.2.2002	GII.4.2006	1.63839
IgG	35	GII.3.1999	GII.4.2012	2.16107
IgG	35	GII.14.1999	GII.4.2012	1.50122
IgG	35	GII.2.2002	GII.4.2012	1.54816
IgG	35	GII.14.1999	GII.3.1999	1.67324
IgG	35	GII.2.2002	GII.3.1999	1.01755
IgG	35	GII.2.2002	GII.14.1999	1.26387
IgG	180	GI.3.1999	GI.1.1968	1.46201
IgG	180	GI.4.2000	GI.1.1968	2.00956
IgG	180	GII.4C	GI.1.1968	3.28447
IgG	180	GII.4.1997	GI.1.1968	3.02861
IgG	180	GII.4.2002	GI.1.1968	3.26187
IgG	180	GII.4.2006	GI.1.1968	3.83157
IgG	180	GII.4.2012	GI.1.1968	3.76165
IgG	180	GII.3.1999	GI.1.1968	3.0556
IgG	180	GII.14.1999	GI.1.1968	3.8095
IgG	180	GII.2.2002	GI.1.1968	2.93864
IgG	180	GI.4.2000	GI.3.1999	2.3741
IgG	180	GII.4C	GI.3.1999	4.02633
IgG	180	GII.4.1997	GI.3.1999	3.97368
IgG	180	GII.4.2002	GI.3.1999	4.00999
IgG	180	GII.4.2006	GI.3.1999	4.34253
IgG	180	GII.4.2012	GI.3.1999	4.20299
IgG	180	GII.3.1999	GI.3.1999	3.53441
IgG	180	GII.14.1999	GI.3.1999	4.35799
IgG	180	GII.2.2002	GI.3.1999	3.32697
IgG	180	GII.4C	GI.4.2000	2.71948
IgG	180	GII.4.1997	GI.4.2000	2.93921
IgG	180	GII.4.2002	GI.4.2000	2.65561
IgG	180	GII.4.2006	GI.4.2000	2.68758
IgG	180	GII.4.2012	GI.4.2000	2.70341
IgG	180	GII.3.1999	GI.4.2000	2.21497
IgG	180	GII.14.1999	GI.4.2000	2.68426
IgG	180	GII.2.2002	GI.4.2000	2.00378
IgG	180	GII.4.1997	GII.4C	0.97771
IgG	180	GII.4.2002	GII.4C	0.371181
IgG	180	GII.4.2006	GII.4C	1.41102
IgG	180	GII.4.2012	GII.4C	1.3147
IgG	180	GII.3.1999	GII.4C	2.08869
IgG	180	GII.14.1999	GII.4C	1.51379
IgG	180	GII.2.2002	GII.4C	1.70507
IgG	180	GII.4.2002	GII.4.1997	0.993219
IgG	180	GII.4.2006	GII.4.1997	2.19962
IgG	180	GII.4.2012	GII.4.1997	2.18263
IgG	180	GII.3.1999	GII.4.1997	2.63348
IgG	180	GII.14.1999	GII.4.1997	2.19578
IgG	180	GII.2.2002	GII.4.1997	2.29227
IgG	180	GII.4.2006	GII.4.2002	1.28982
IgG	180	GII.4.2012	GII.4.2002	1.20883
IgG	180	GII.3.1999	GII.4.2002	1.92493
IgG	180	GII.14.1999	GII.4.2002	1.34667
IgG	180	GII.2.2002	GII.4.2002	1.58655
IgG	180	GII.4.2012	GII.4.2006	0.607009
IgG	180	GII.3.1999	GII.4.2006	1.65866
IgG	180	GII.14.1999	GII.4.2006	0.305659
IgG	180	GII.2.2002	GII.4.2006	1.23804
IgG	180	GII.3.1999	GII.4.2012	1.54659
IgG	180	GII.14.1999	GII.4.2012	0.85283
IgG	180	GII.2.2002	GII.4.2012	1.24056
IgG	180	GII.14.1999	GII.3.1999	1.68542
IgG	180	GII.2.2002	GII.3.1999	0.886098
IgG	180	GII.2.2002	GII.14.1999	1.2701
Blockade Ab	0	GI.3.1999	GI.1.1968	1.68516
Blockade Ab	0	GI.4.2000	GI.1.1968	0
Blockade Ab	0	GII.4C	GI.1.1968	2.46768
Blockade Ab	0	GII.4.1997	GI.1.1968	4.52587
Blockade Ab	0	GII.4.2002	GI.1.1968	4.49023
Blockade Ab	0	GII.4.2006	GI.1.1968	3.77615
Blockade Ab	0	GII.4.2012	GI.1.1968	3.08851
Blockade Ab	0	GII.3.1999	GI.1.1968	3.70699
Blockade Ab	0	GII.14.1999	GI.1.1968	2.44725
Blockade Ab	0	GI.4.2000	GI.3.1999	1.68516
Blockade Ab	0	GII.4C	GI.3.1999	2.98817
Blockade Ab	0	GII.4.1997	GI.3.1999	4.39397
Blockade Ab	0	GII.4.2002	GI.3.1999	3.88379
Blockade Ab	0	GII.4.2006	GI.3.1999	3.67699
Blockade Ab	0	GII.4.2012	GI.3.1999	2.62499
Blockade Ab	0	GII.3.1999	GI.3.1999	2.84702
Blockade Ab	0	GII.14.1999	GI.3.1999	0.960977
Blockade Ab	0	GII.4C	GI.4.2000	2.46768
Blockade Ab	0	GII.4.1997	GI.4.2000	4.52587
Blockade Ab	0	GII.4.2002	GI.4.2000	4.49023
Blockade Ab	0	GII.4.2006	GI.4.2000	3.77615
Blockade Ab	0	GII.4.2012	GI.4.2000	3.08851
Blockade Ab	0	GII.3.1999	GI.4.2000	3.70699
Blockade Ab	0	GII.14.1999	GI.4.2000	2.44725
Blockade Ab	0	GII.4.1997	GII.4C	2.6665
Blockade Ab	0	GII.4.2002	GII.4C	2.78878
Blockade Ab	0	GII.4.2006	GII.4C	2.11572
Blockade Ab	0	GII.4.2012	GII.4C	1.9622
Blockade Ab	0	GII.3.1999	GII.4C	3.79377
Blockade Ab	0	GII.14.1999	GII.4C	3.47541
Blockade Ab	0	GII.4.2002	GII.4.1997	1.59577
Blockade Ab	0	GII.4.2006	GII.4.1997	0.766616
Blockade Ab	0	GII.4.2012	GII.4.1997	1.79638
Blockade Ab	0	GII.3.1999	GII.4.1997	4.07497
Blockade Ab	0	GII.14.1999	GII.4.1997	4.27385
Blockade Ab	0	GII.4.2006	GII.4.2002	1.64392
Blockade Ab	0	GII.4.2012	GII.4.2002	1.56502
Blockade Ab	0	GII.3.1999	GII.4.2002	3.54875
Blockade Ab	0	GII.14.1999	GII.4.2002	3.74448
Blockade Ab	0	GII.4.2012	GII.4.2006	1.15903
Blockade Ab	0	GII.3.1999	GII.4.2006	3.59958
Blockade Ab	0	GII.14.1999	GII.4.2006	3.5966
Blockade Ab	0	GII.3.1999	GII.4.2012	2.84972
Blockade Ab	0	GII.14.1999	GII.4.2012	2.52283
Blockade Ab	0	GII.14.1999	GII.3.1999	2.6153
Blockade Ab	7	GI.3.1999	GI.1.1968	4.47323
Blockade Ab	7	GI.4.2000	GI.1.1968	4.96345
Blockade Ab	7	GII.4C	GI.1.1968	5.69874
Blockade Ab	7	GII.4.1997	GI.1.1968	7.78467
Blockade Ab	7	GII.4.2002	GI.1.1968	7.22238
Blockade Ab	7	GII.4.2006	GI.1.1968	6.90884
Blockade Ab	7	GII.4.2012	GI.1.1968	7.50835
Blockade Ab	7	GII.3.1999	GI.1.1968	4.4148
Blockade Ab	7	GII.14.1999	GI.1.1968	4.53313
Blockade Ab	7	GI.4.2000	GI.3.1999	3.06233
Blockade Ab	7	GII.4C	GI.3.1999	7.43842
Blockade Ab	7	GII.4.1997	GI.3.1999	9.2421
Blockade Ab	7	GII.4.2002	GI.3.1999	8.32548
Blockade Ab	7	GII.4.2006	GI.3.1999	6.87742
Blockade Ab	7	GII.4.2012	GI.3.1999	7.94363
Blockade Ab	7	GII.3.1999	GI.3.1999	4.23146
Blockade Ab	7	GII.14.1999	GI.3.1999	4.6666
Blockade Ab	7	GII.4C	GI.4.2000	8.30772
Blockade Ab	7	GII.4.1997	GI.4.2000	10.1011
Blockade Ab	7	GII.4.2002	GI.4.2000	9.31896
Blockade Ab	7	GII.4.2006	GI.4.2000	7.75802
Blockade Ab	7	GII.4.2012	GI.4.2000	8.58942
Blockade Ab	7	GII.3.1999	GI.4.2000	5.17467
Blockade Ab	7	GII.14.1999	GI.4.2000	5.67651
Blockade Ab	7	GII.4.1997	GII.4C	4.73026
Blockade Ab	7	GII.4.2002	GII.4C	3.84835
Blockade Ab	7	GII.4.2006	GII.4C	4.90136
Blockade Ab	7	GII.4.2012	GII.4C	4.84466
Blockade Ab	7	GII.3.1999	GII.4C	4.17798
Blockade Ab	7	GII.14.1999	GII.4C	4.19599
Blockade Ab	7	GII.4.2002	GII.4.1997	1.86404
Blockade Ab	7	GII.4.2006	GII.4.1997	3.43322
Blockade Ab	7	GII.4.2012	GII.4.1997	3.05682
Blockade Ab	7	GII.3.1999	GII.4.1997	6.98535
Blockade Ab	7	GII.14.1999	GII.4.1997	4.98668
Blockade Ab	7	GII.4.2006	GII.4.2002	2.55661
Blockade Ab	7	GII.4.2012	GII.4.2002	2.03853
Blockade Ab	7	GII.3.1999	GII.4.2002	5.62578
Blockade Ab	7	GII.14.1999	GII.4.2002	4.17344
Blockade Ab	7	GII.4.2012	GII.4.2006	2.0101
Blockade Ab	7	GII.3.1999	GII.4.2006	4.88498
Blockade Ab	7	GII.14.1999	GII.4.2006	3.15895
Blockade Ab	7	GII.3.1999	GII.4.2012	5.55652
Blockade Ab	7	GII.14.1999	GII.4.2012	3.8573
Blockade Ab	7	GII.14.1999	GII.3.1999	3.16889
Blockade Ab	35	GI.3.1999	GI.1.1968	4.77222
Blockade Ab	35	GI.4.2000	GI.1.1968	5.80444
Blockade Ab	35	GII.4C	GI.1.1968	3.46163
Blockade Ab	35	GII.4.1997	GI.1.1968	4.76586
Blockade Ab	35	GII.4.2002	GI.1.1968	6.23891
Blockade Ab	35	GII.4.2006	GI.1.1968	4.9239
Blockade Ab	35	GII.4.2012	GI.1.1968	4.94865
Blockade Ab	35	GII.3.1999	GI.1.1968	3.54824
Blockade Ab	35	GII.14.1999	GI.1.1968	4.41002
Blockade Ab	35	GI.4.2000	GI.3.1999	3.88249
Blockade Ab	35	GII.4C	GI.3.1999	4.41825
Blockade Ab	35	GII.4.1997	GI.3.1999	5.17553
Blockade Ab	35	GII.4.2002	GI.3.1999	6.22236
Blockade Ab	35	GII.4.2006	GI.3.1999	3.64187
Blockade Ab	35	GII.4.2012	GI.3.1999	3.67917
Blockade Ab	35	GII.3.1999	GI.3.1999	2.02744
Blockade Ab	35	GII.14.1999	GI.3.1999	2.32023
Blockade Ab	35	GII.4C	GI.4.2000	5.98811
Blockade Ab	35	GII.4.1997	GI.4.2000	6.9431
Blockade Ab	35	GII.4.2002	GI.4.2000	7.67536
Blockade Ab	35	GII.4.2006	GI.4.2000	5.66227
Blockade Ab	35	GII.4.2012	GI.4.2000	5.26235
Blockade Ab	35	GII.3.1999	GI.4.2000	3.28333
Blockade Ab	35	GII.14.1999	GI.4.2000	3.4112
Blockade Ab	35	GII.4.1997	GII.4C	3.58766
Blockade Ab	35	GII.4.2002	GII.4C	4.1819
Blockade Ab	35	GII.4.2006	GII.4C	4.07955
Blockade Ab	35	GII.4.2012	GII.4C	3.89267
Blockade Ab	35	GII.3.1999	GII.4C	4.07912
Blockade Ab	35	GII.14.1999	GII.4C	4.90168
Blockade Ab	35	GII.4.2002	GII.4.1997	1.98487
Blockade Ab	35	GII.4.2006	GII.4.1997	2.47603
Blockade Ab	35	GII.4.2012	GII.4.1997	2.44278
Blockade Ab	35	GII.3.1999	GII.4.1997	5.41179
Blockade Ab	35	GII.14.1999	GII.4.1997	4.69349
Blockade Ab	35	GII.4.2006	GII.4.2002	3.75604
Blockade Ab	35	GII.4.2012	GII.4.2002	3.53575
Blockade Ab	35	GII.3.1999	GII.4.2002	6.67306
Blockade Ab	35	GII.14.1999	GII.4.2002	5.92622
Blockade Ab	35	GII.4.2012	GII.4.2006	1.07076
Blockade Ab	35	GII.3.1999	GII.4.2006	4.19093
Blockade Ab	35	GII.14.1999	GII.4.2006	3.29665
Blockade Ab	35	GII.3.1999	GII.4.2012	4.01266
Blockade Ab	35	GII.14.1999	GII.4.2012	3.36984
Blockade Ab	35	GII.14.1999	GII.3.1999	2.6356
Blockade Ab	180	GI.3.1999	GI.1.1968	2.47506
Blockade Ab	180	GI.4.2000	GI.1.1968	1.95637
Blockade Ab	180	GII.4C	GI.1.1968	3.70215
Blockade Ab	180	GII.4.1997	GI.1.1968	5.68387
Blockade Ab	180	GII.4.2002	GI.1.1968	3.37084
Blockade Ab	180	GII.4.2006	GI.1.1968	2.96547
Blockade Ab	180	GII.4.2012	GI.1.1968	3.36953
Blockade Ab	180	GII.3.1999	GI.1.1968	2.89722
Blockade Ab	180	GII.14.1999	GI.1.1968	1.77792
Blockade Ab	180	GI.4.2000	GI.3.1999	2.08877
Blockade Ab	180	GII.4C	GI.3.1999	3.14912
Blockade Ab	180	GII.4.1997	GI.3.1999	5.5112
Blockade Ab	180	GII.4.2002	GI.3.1999	3.11501
Blockade Ab	180	GII.4.2006	GI.3.1999	2.27193
Blockade Ab	180	GII.4.2012	GI.3.1999	2.62919
Blockade Ab	180	GII.3.1999	GI.3.1999	3.44855
Blockade Ab	180	GII.14.1999	GI.3.1999	2.19038
Blockade Ab	180	GII.4C	GI.4.2000	4.44135
Blockade Ab	180	GII.4.1997	GI.4.2000	6.57391
Blockade Ab	180	GII.4.2002	GI.4.2000	4.39211
Blockade Ab	180	GII.4.2006	GI.4.2000	3.79552
Blockade Ab	180	GII.4.2012	GI.4.2000	3.82752
Blockade Ab	180	GII.3.1999	GI.4.2000	3.81618
Blockade Ab	180	GII.14.1999	GI.4.2000	2.93114
Blockade Ab	180	GII.4.1997	GII.4C	3.03967
Blockade Ab	180	GII.4.2002	GII.4C	1.52657
Blockade Ab	180	GII.4.2006	GII.4C	1.98142
Blockade Ab	180	GII.4.2012	GII.4C	2.39418
Blockade Ab	180	GII.3.1999	GII.4C	3.08141
Blockade Ab	180	GII.14.1999	GII.4C	2.4536
Blockade Ab	180	GII.4.2002	GII.4.1997	2.90755
Blockade Ab	180	GII.4.2006	GII.4.1997	4.03061
Blockade Ab	180	GII.4.2012	GII.4.1997	3.95201
Blockade Ab	180	GII.3.1999	GII.4.1997	5.45458
Blockade Ab	180	GII.14.1999	GII.4.1997	4.51424
Blockade Ab	180	GII.4.2006	GII.4.2002	1.18687
Blockade Ab	180	GII.4.2012	GII.4.2002	1.61932
Blockade Ab	180	GII.3.1999	GII.4.2002	3.19815
Blockade Ab	180	GII.14.1999	GII.4.2002	1.81328
Blockade Ab	180	GII.4.2012	GII.4.2006	1.36011
Blockade Ab	180	GII.3.1999	GII.4.2006	2.9038
Blockade Ab	180	GII.14.1999	GII.4.2006	1.35346
Blockade Ab	180	GII.3.1999	GII.4.2012	3.21994
Blockade Ab	180	GII.14.1999	GII.4.2012	1.81269
Blockade Ab	180	GII.14.1999	GII.3.1999	2.30101
