# Supplementary material for: Broad Blockade Antibody Responses in Human Volunteers after Immunization with a Multivalent Norovirus VLP Candidate Vaccine: Immunological Analyses from a Phase I Clinical Trial
Source: PLoS Med. 2015 Mar 24;12(3):e1001807. doi: 10.1371/journal.pmed.1001807 (PMC4371888; doi:10.1371/journal.pmed.1001807)
Supplement: S5 Fig — The ratio of blockade Ab to IgG was determined for GI (blue), GII.4 (grey), and non-GII.4 GII (green) VLPs as a potential marker for Ab response maturity. ND, not determined. (XLSX) [file pmed.1001807.s005.xlsx]

## Sheet: Sheet1
Figure S5. Ratio of blockade Ab to IgG by day and VLP among the 50/50 µg VLP dose group.
VLP	Day 0	Day 7	Day 21	Day 35	Day 180
GI.1	0.24	0.71	0.2	0.24	0.12
GI.3	0.2	0.19	ND	0.15	0.09
GI.4	0.26	0.16	ND	0.09	0.13
GII.4C	0.41	2.15	1.07	0.65	0.44
GII.4.1997	0.36	1.5	ND	0.44	0.57
GII.4.2002	0.62	1.39	ND	0.68	0.37
GII.4.2006b	0.61	1.77	ND	0.95	0.36
GII.4.2006b.P.D302	0.33	2.06	1.92	0.52	0.35
GII.4.2012	0.48	1.65	1.58	0.63	0.42
GII.2	ND	ND	ND	ND	ND
GII.3	0.37	1.27	ND	0.32	0.44
GII.14	0.33	2.78	ND	0.26	0.39
